# Supplementary material
Source: PubMed Central journal article supplement (PMC6353555)
Supplement: NIHMS1505616-supplement-1.pdf [file NIHMS1505616-supplement-1.pdf]

## Eosinophils staining

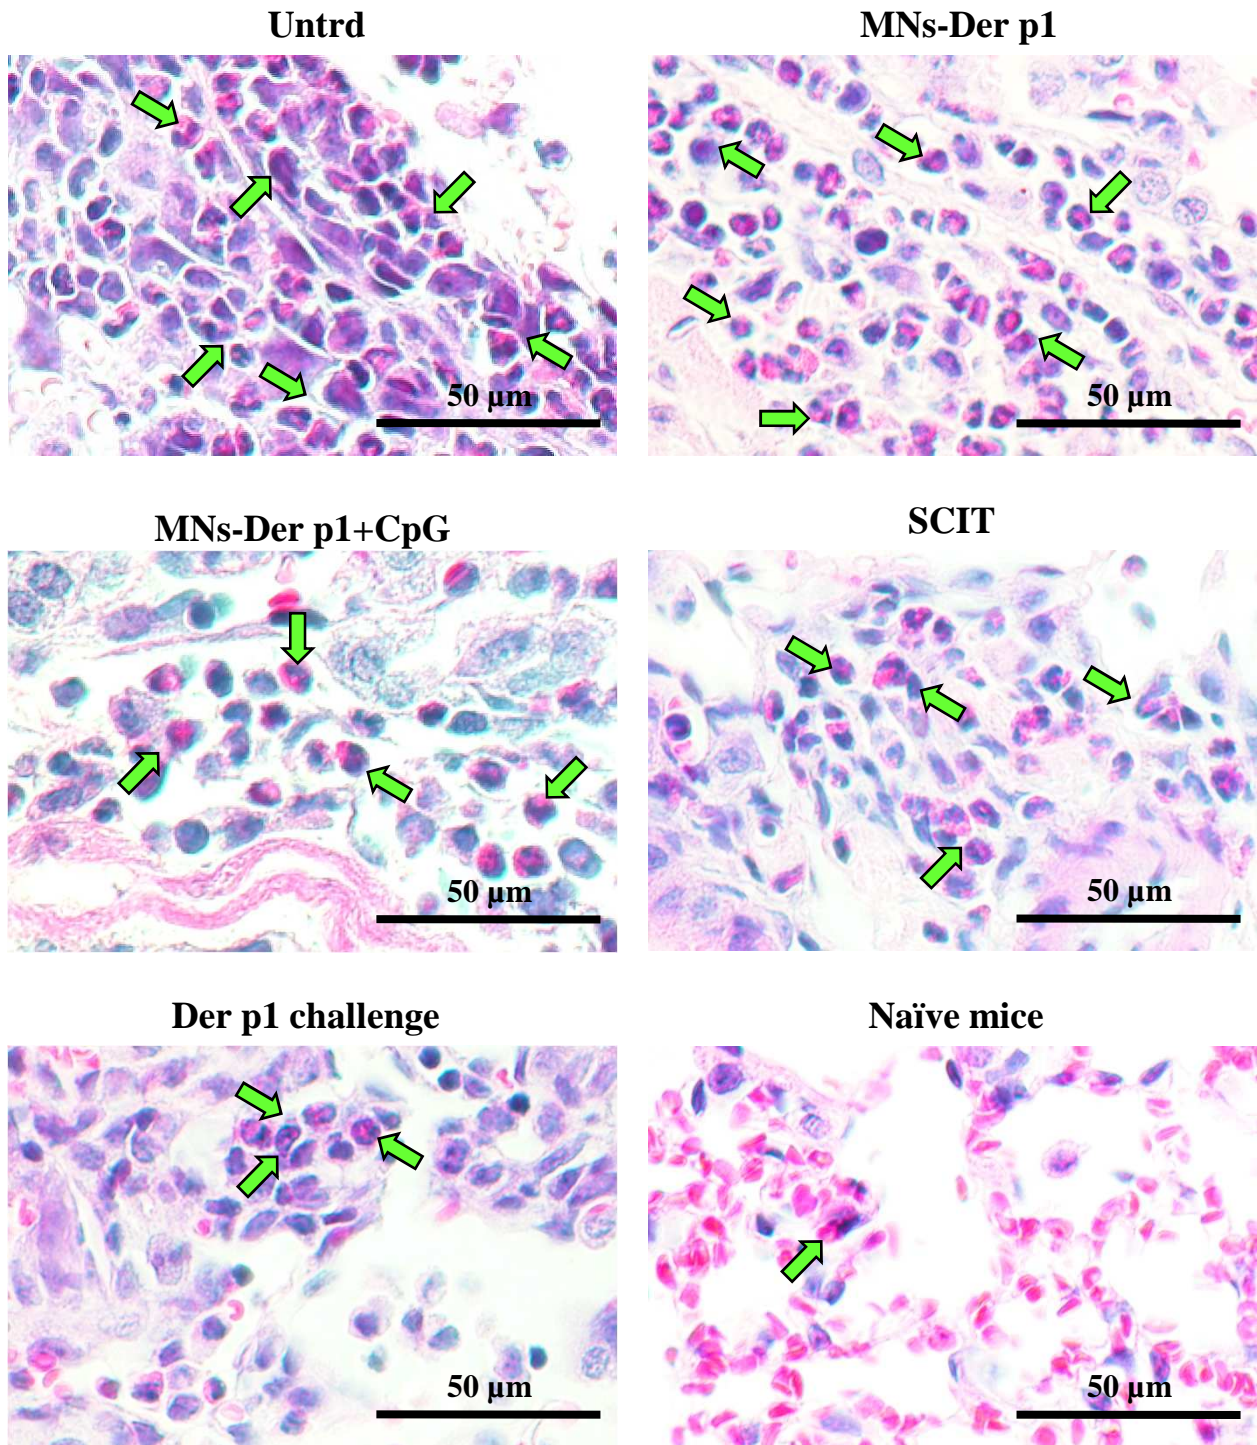

**Supplementary Figure 1:** Hematoxylin and eosin staining for the eosinophils in tissue sections of Untrd, MNs-Der p1, MNs-Der p1+CpG, SCIT, Der p1 challenge and naïve mice groups.

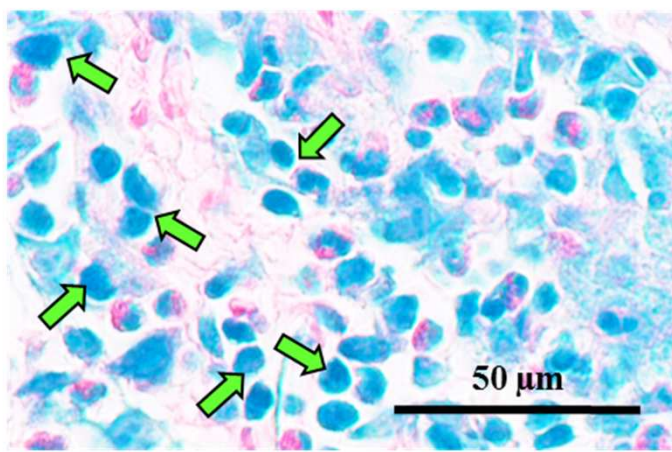

**MNs-Der p1+CpG**

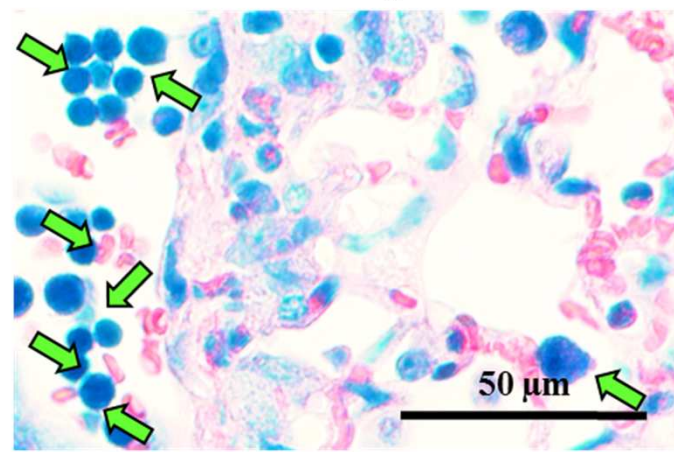

**SCIT**

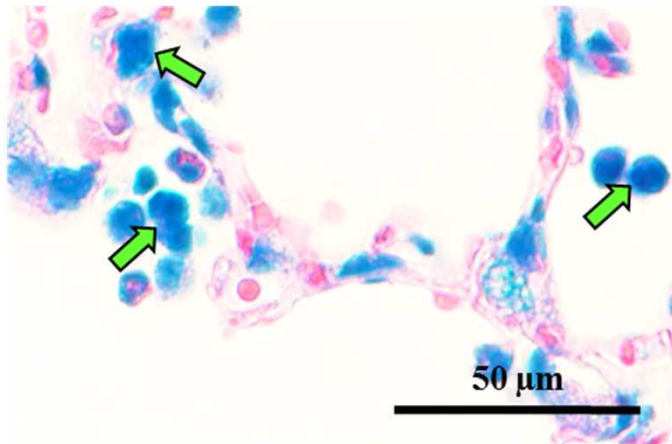

**Der p1 challenge**

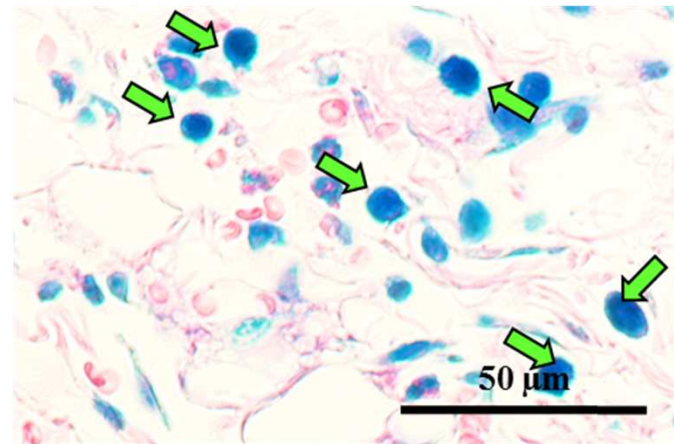

**Naïve mice**

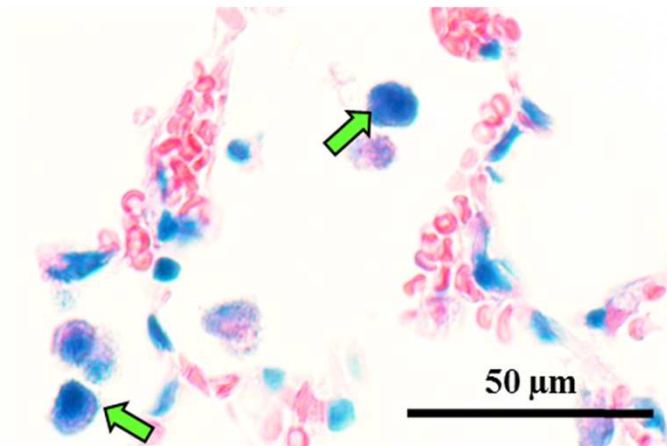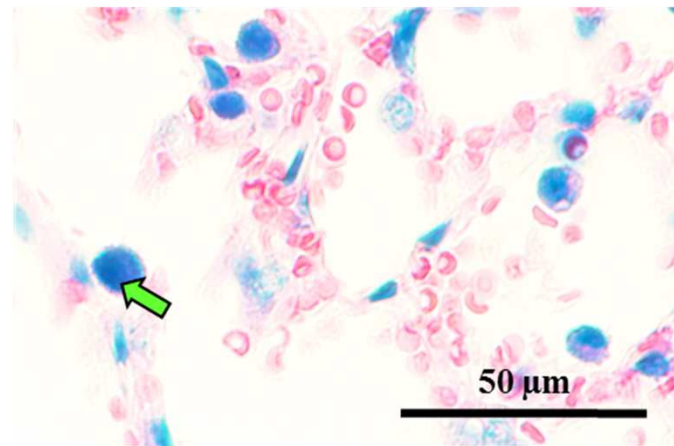



## SUPPLEMENTARY TABLE

**Supplementary Table 1: Treatment groups and doses**

| Groups           | Vaccination                                                        | Sensitization <sup>†</sup> | Challenge <sup>‡</sup> | Comment                                                                                    |
|------------------|--------------------------------------------------------------------|----------------------------|------------------------|--------------------------------------------------------------------------------------------|
| Untrd            | Untreated group that received MNs that were not coated with Der p1 | ✓                          | ✓                      | Negative control, expected to induce high inflammation                                     |
| MNs-Der p1       | Der p1 coated MNs (25 µg Der p1)                                   | ✓                          | ✓                      | Test group to study efficacy of MNs                                                        |
| MNs-Der p1+CpG   | Der p1+CpG coated MNs (25 µg Der p1+25 µg CpG)                     | ✓                          | ✓                      | Test group to study effect of CpG as an adjuvant                                           |
| SCIT             | Der p1 (25 µg )+Alum (250 µg)                                      | ✓                          | ✓                      | Positive control to mimic clinically approved subcutaneous allergy immunotherapy procedure |
| Der p1 challenge | ✗                                                                  | ✗                          | ✓                      | Negative control to assess effect of Der p1 challenge on naïve mice                        |
| Naive            | ✗                                                                  | ✗                          | ✗                      | Negative control (without any treatment)                                                   |

<sup>†</sup>**Sensitization:** Two doses each containing 25 µg Der p1 + 2 mg alum through intraperitoneal route at weekly intervals

<sup>‡</sup>**Challenge:** 50 µg Der p1 through the nasal route given on three consecutive days
